# Supplementary material
Source: publisher figshare collection journal article supplement (https://tandf.figshare.com/ndownloader/files/14452484)
Supplement: Supplementary file 1 [file 14452484]

**Supplementary Data**

Synthesis, DFT analysis and DNA studies, cytotoxicity and luminescence properties of a dinuclear copper(II) complex with 1,10-phenanthroline and 4‑aminobenzoate

S. BASKARAN, M. MURALI KRISHNAN, M.N. ARUMUGHAM* and R. KUMAR

**Figure S1:** The IR spectra of the [Cu2(phen)2(4-aminobenzoate)2(H2O)2](NO3)2. (4-aminobenzoic-acid)2.3(H2O) complex.

**Bacteria**


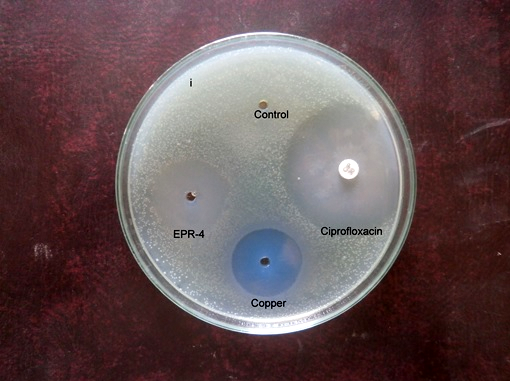

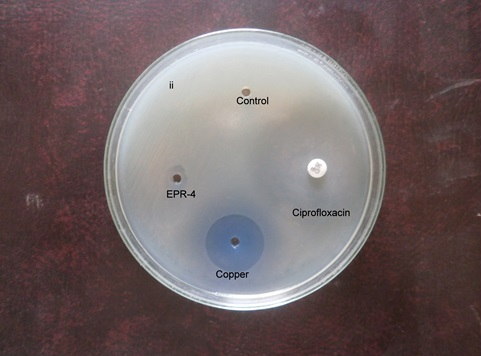

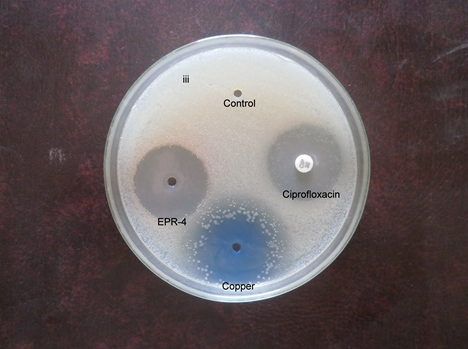


*Staphylococcus epidermidis Escherichia coli Streptococcus faecalis*

**Fungi**

*
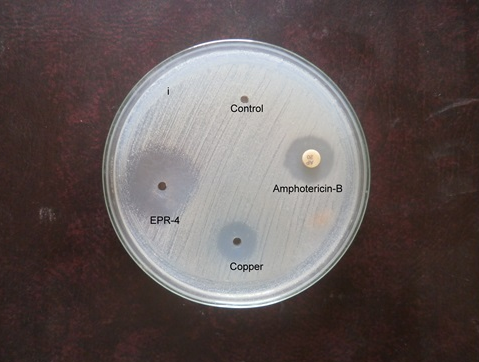
*
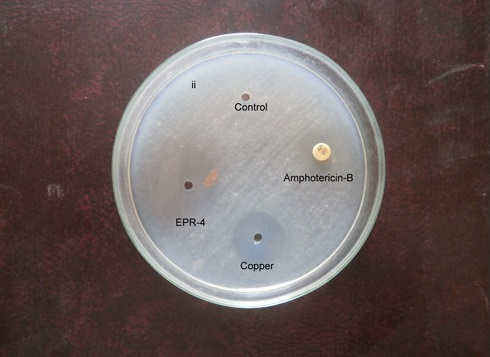

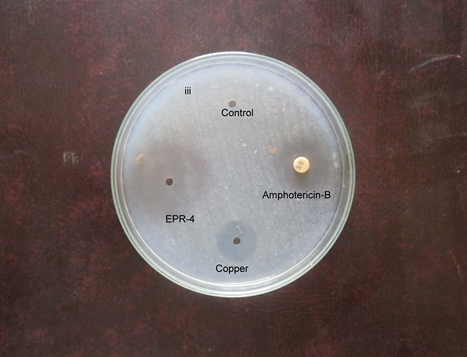


*Candida albicans Aspergillus niger Mucor Sps*

**Figure S2:** Biological Activity


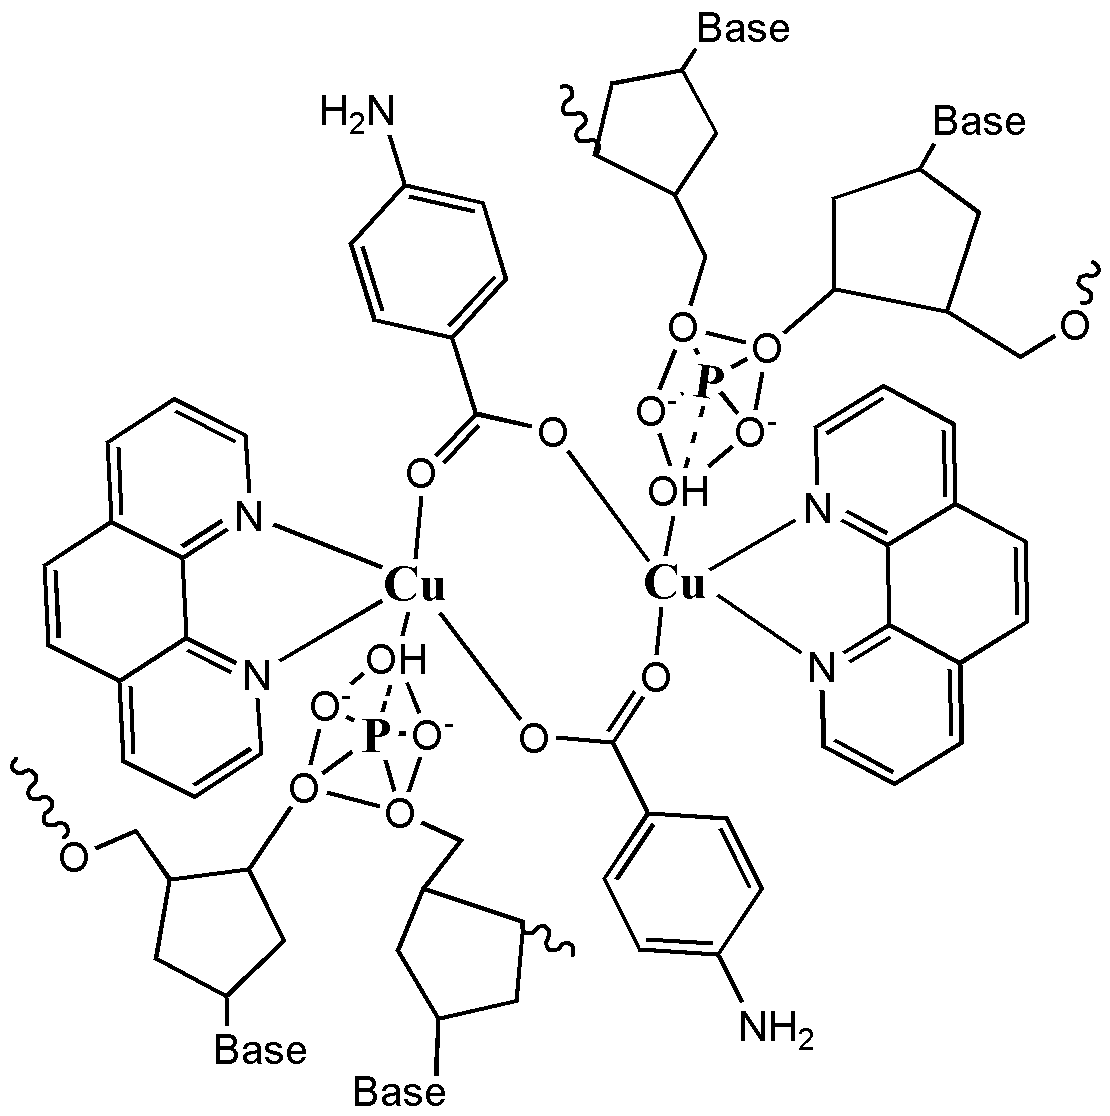


**Scheme 1** The hydrolytic cleavage mechanism


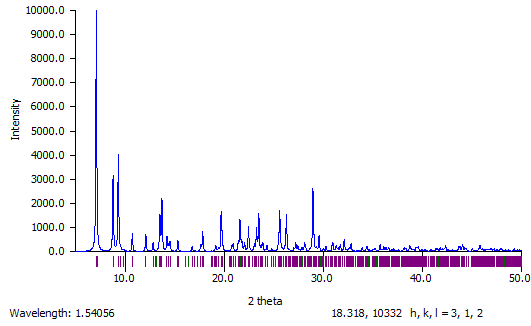
**Fig. S3**, Power X-ray diffraction


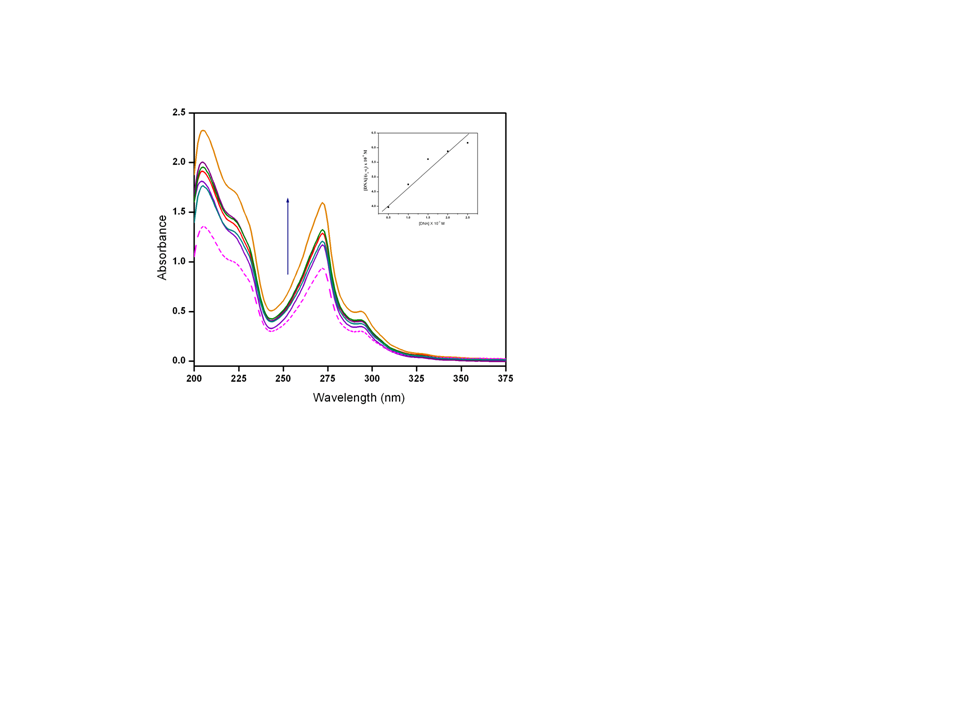


**Fig. S4,** Binding constants of free 4- aminobenzoic acid

Table 2. Bond lengths [A] and angles [deg].

_____________________________________________________________________

C(1)-N(1) 1.356(3)

C(1)-C(5) 1.398(3)

C(1)-C(12) 1.429(3)

C(2)-N(1) 1.326(3)

C(2)-C(3) 1.387(4)

C(2)-H(2) 0.9300

C(3)-C(4) 1.361(4)

C(3)-H(3) 0.9300

C(4)-C(5) 1.403(4)

C(4)-H(4) 0.9300

C(5)-C(6) 1.429(4)

C(6)-C(7) 1.340(4)

C(6)-H(6) 0.9300

C(7)-C(8) 1.425(4)

C(7)-H(7) 0.9300

C(8)-C(12) 1.399(3)

C(8)-C(9) 1.410(4)

C(9)-C(10) 1.349(4)

C(9)-H(9) 0.9300

C(10)-C(11) 1.391(4)

C(10)-H(10) 0.9300

C(11)-N(2) 1.326(3)

C(11)-H(11) 0.9300

C(12)-N(2) 1.352(3)

C(13)-O(1) 1.262(3)

C(13)-O(2) 1.265(2)

C(13)-C(14) 1.477(3)

C(14)-C(19) 1.389(3)

C(14)-C(15) 1.389(3)

C(15)-C(16) 1.366(3)

C(15)-H(15) 0.9300

C(16)-C(17) 1.393(3)

C(16)-H(16) 0.9300

C(17)-N(3) 1.372(3)

C(17)-C(18) 1.397(3)

C(18)-C(19) 1.365(3)

C(18)-H(18) 0.9300

C(19)-H(19) 0.9300

C(20)-O(5) 1.215(3)

C(20)-O(4) 1.325(3)

C(20)-C(21) 1.456(3)

C(21)-C(22) 1.391(3)

C(21)-C(26) 1.392(3)

C(22)-C(23) 1.364(3)

C(22)-H(22) 0.9300

C(23)-C(24) 1.394(3)

C(23)-H(23) 0.9300

C(24)-N(4) 1.375(3)

C(24)-C(25) 1.397(3)

C(25)-C(26) 1.364(3)

C(25)-H(25) 0.9300

C(26)-H(26) 0.9300

N(1)-Cu(1) 2.0129(18)

N(2)-Cu(1) 2.0158(18)

N(3)-H(3B) 0.889(10)

N(3)-H(3A) 0.894(10)

N(4)-H(4A) 0.886(10)

N(4)-H(4B) 0.897(10)

N(5)-O(7) 1.222(3)

N(5)-O(8) 1.227(3)

N(5)-O(6) 1.232(3)

O(1)-Cu(1) 1.9393(15)

O(2)-Cu(1)#1 1.9280(15)

O(3)-Cu(1) 2.2703(16)

O(3)-H(3D) 0.917(10)

O(3)-H(3C) 0.917(10)

O(4)-H(4C) 0.8200

Cu(1)-O(2)#1 1.9280(15)

Cu(1)-Cu(1)#1 3.0570(5)

N(1)-C(1)-C(5) 123.3(2)

N(1)-C(1)-C(12) 116.47(19)

C(5)-C(1)-C(12) 120.2(2)

N(1)-C(2)-C(3) 122.2(3)

N(1)-C(2)-H(2) 118.9

C(3)-C(2)-H(2) 118.9

C(4)-C(3)-C(2) 119.6(3)

C(4)-C(3)-H(3) 120.2

C(2)-C(3)-H(3) 120.2

C(3)-C(4)-C(5) 120.3(2)

C(3)-C(4)-H(4) 119.9

C(5)-C(4)-H(4) 119.9

C(1)-C(5)-C(4) 116.2(3)

C(1)-C(5)-C(6) 118.3(2)

C(4)-C(5)-C(6) 125.4(3)

C(7)-C(6)-C(5) 121.5(2)

C(7)-C(6)-H(6) 119.3

C(5)-C(6)-H(6) 119.3

C(6)-C(7)-C(8) 121.4(3)

C(6)-C(7)-H(7) 119.3

C(8)-C(7)-H(7) 119.3

C(12)-C(8)-C(9) 115.8(2)

C(12)-C(8)-C(7) 118.6(2)

C(9)-C(8)-C(7) 125.6(3)

C(10)-C(9)-C(8) 120.3(2)

C(10)-C(9)-H(9) 119.8

C(8)-C(9)-H(9) 119.8

C(9)-C(10)-C(11) 119.8(3)

C(9)-C(10)-H(10) 120.1

C(11)-C(10)-H(10) 120.1

N(2)-C(11)-C(10) 122.2(2)

N(2)-C(11)-H(11) 118.9

C(10)-C(11)-H(11) 118.9

N(2)-C(12)-C(8) 123.8(2)

N(2)-C(12)-C(1) 116.3(2)

C(8)-C(12)-C(1) 119.9(2)

O(1)-C(13)-O(2) 125.0(2)

O(1)-C(13)-C(14) 117.86(18)

O(2)-C(13)-C(14) 117.12(19)

C(19)-C(14)-C(15) 117.7(2)

C(19)-C(14)-C(13) 121.21(19)

C(15)-C(14)-C(13) 121.03(19)

C(16)-C(15)-C(14) 121.8(2)

C(16)-C(15)-H(15) 119.1

C(14)-C(15)-H(15) 119.1

C(15)-C(16)-C(17) 120.3(2)

C(15)-C(16)-H(16) 119.9

C(17)-C(16)-H(16) 119.9

N(3)-C(17)-C(16) 121.3(2)

N(3)-C(17)-C(18) 120.4(2)

C(16)-C(17)-C(18) 118.3(2)

C(19)-C(18)-C(17) 120.7(2)

C(19)-C(18)-H(18) 119.7

C(17)-C(18)-H(18) 119.7

C(18)-C(19)-C(14) 121.3(2)

C(18)-C(19)-H(19) 119.3

C(14)-C(19)-H(19) 119.3

O(5)-C(20)-O(4) 120.7(2)

O(5)-C(20)-C(21) 124.4(2)

O(4)-C(20)-C(21) 114.90(19)

C(22)-C(21)-C(26) 118.1(2)

C(22)-C(21)-C(20) 122.9(2)

C(26)-C(21)-C(20) 119.0(2)

C(23)-C(22)-C(21) 120.9(2)

C(23)-C(22)-H(22) 119.5

C(21)-C(22)-H(22) 119.5

C(22)-C(23)-C(24) 121.1(2)

C(22)-C(23)-H(23) 119.4

C(24)-C(23)-H(23) 119.4

N(4)-C(24)-C(23) 121.7(2)

N(4)-C(24)-C(25) 120.3(2)

C(23)-C(24)-C(25) 117.9(2)

C(26)-C(25)-C(24) 120.7(2)

C(26)-C(25)-H(25) 119.6

C(24)-C(25)-H(25) 119.6

C(25)-C(26)-C(21) 121.2(2)

C(25)-C(26)-H(26) 119.4

C(21)-C(26)-H(26) 119.4

C(2)-N(1)-C(1) 118.3(2)

C(2)-N(1)-Cu(1) 129.03(18)

C(1)-N(1)-Cu(1) 112.65(14)

C(11)-N(2)-C(12) 118.0(2)

C(11)-N(2)-Cu(1) 129.16(16)

C(12)-N(2)-Cu(1) 112.83(14)

C(17)-N(3)-H(3B) 114(2)

C(17)-N(3)-H(3A) 119(3)

H(3B)-N(3)-H(3A) 126(3)

C(24)-N(4)-H(4A) 118(2)

C(24)-N(4)-H(4B) 121(2)

H(4A)-N(4)-H(4B) 114(3)

O(7)-N(5)-O(8) 120.8(2)

O(7)-N(5)-O(6) 119.9(2)

O(8)-N(5)-O(6) 119.3(2)

C(13)-O(1)-Cu(1) 126.07(14)

C(13)-O(2)-Cu(1)#1 132.16(15)

Cu(1)-O(3)-H(3D) 112.8(14)

Cu(1)-O(3)-H(3C) 115(2)

H(3D)-O(3)-H(3C) 101(2)

C(20)-O(4)-H(4C) 109.5

O(2)#1-Cu(1)-O(1) 94.28(7)

O(2)#1-Cu(1)-N(1) 173.80(7)

O(1)-Cu(1)-N(1) 90.60(7)

O(2)#1-Cu(1)-N(2) 92.77(7)

O(1)-Cu(1)-N(2) 164.17(7)

N(1)-Cu(1)-N(2) 81.57(7)

O(2)#1-Cu(1)-O(3) 89.07(6)

O(1)-Cu(1)-O(3) 94.56(6)

N(1)-Cu(1)-O(3) 94.36(6)

N(2)-Cu(1)-O(3) 99.72(6)

O(2)#1-Cu(1)-Cu(1)#1 75.88(5)

O(1)-Cu(1)-Cu(1)#1 79.57(5)

N(1)-Cu(1)-Cu(1)#1 101.31(5)

N(2)-Cu(1)-Cu(1)#1 88.45(5)

O(3)-Cu(1)-Cu(1)#1 163.26(4)

_____________________________________________________________
